# Supplementary material for: An African-specific haplotype in MRGPRX4 is associated with menthol cigarette smoking
Source: PLOS journal article supplement (doi:10.1371/journal.pgen.1007916), 2019-02-15
Supplement: S2 (10.1371/journal.pgen.1007916.s002) [file journal.pgen.1007916.s002]

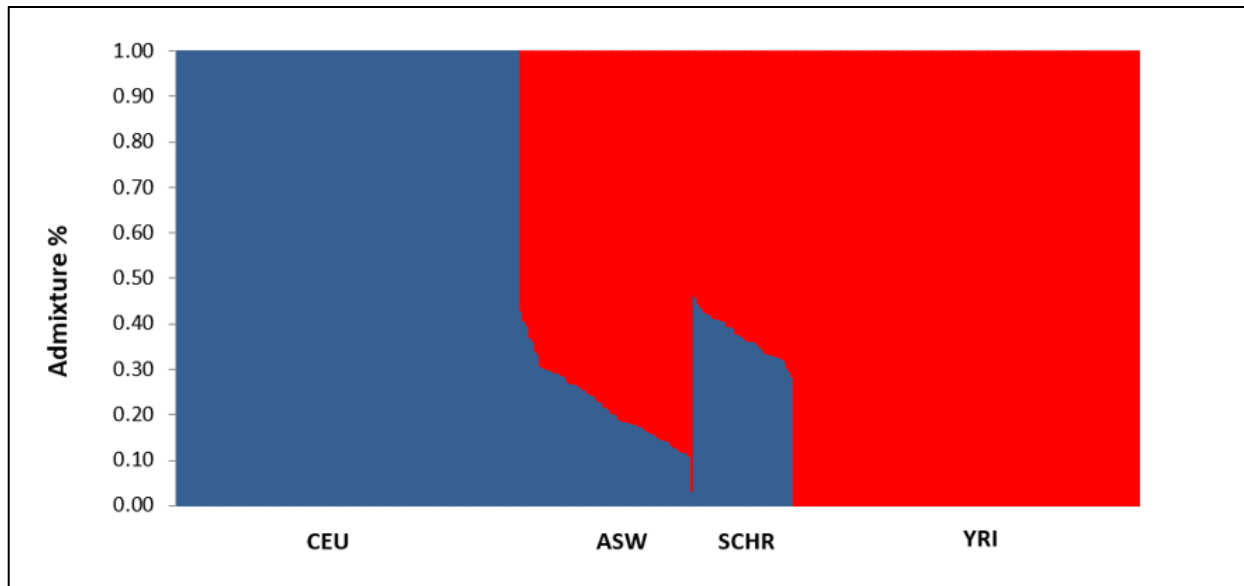

**S2 Figure. Genetically inferred ancestry of Schroeder participants relative to populations represented in the 1000 genomes project.** The figure shows that Schroeder subjects (SCHR) show a greater degree of European admixture (CEU, Utah Residents with Northern and Western Ancestry), relative to West African populations (YRI) and African American from Southwest US (ASW).
